# Supplementary material
Source: PubMed Central journal article supplement (PMC2738696)
Supplement: emboj2009199s2.pdf [file emboj2009199s2.pdf]

Coding sequences and amino acid sequences of proteins used in this study

|                 |                                                    |
|-----------------|----------------------------------------------------|
| Plasmid name    | pSF345                                             |
| Encoded protein | His <sub>10</sub> -TEV-Nsp1p <sup>1-601</sup> -Cys |
| Features (nt)   | 4-33 His <sub>10</sub> -tag                        |
|                 | 40-63 TEV protease recognition site                |
|                 | 76-1875 Nsp1p <sup>1-601</sup>                     |

```

1 atgccaccaccatcaccatcaccaccatcaccacggatccggagaaaacctgtacttccagggtacctccatggggaacttcaatacacct
  M H H H H H H H H H H G S G E N L Y F Q G T S M G N F N T P
91 caacaaacaaaacgcccttttcgctcgggactgccacaataactctaaccaccacaatcagaattcctctactgggtcggggcccttc
  Q Q N K T P F S F G T A N N N S N T T N Q N S S T G A G A F
181 ggaacaggtaaatcaacatttggtttcaacaattctgcgcccacaaacacgaacaatgcaaaactcttcaatcacacctgcatctggtagc
  G T G Q S T F G F N N S A P N N T N N A N S S I T P A F G S
271 aataacactggtaataactgcattcggtaacagtaaccccacaagtaacgtttttggcagcaacaattctacgactaatacatctggtagt
  N N T G N T A F G N S N P T S N V F G S N N S T T N T F G S
361 aatagtcaggacatccctttttggatcttcagtgctcaacaacgaagagcaatggaactgctggaggaaatcacatttggttcttca
  N S A G T S L F G S S S A Q Q T K S N G T A G G N T F G S S
451 tccttattcaataacagtaataatagcaatcagcaaaaacctgcgttcggcggttgtaatttggcggcgcaataacacaaactcctagc
  S L F N N S T N S N T T K P A F G G L N F G G N N T T P S
541 tcgaccggtaatgctaacacaagtaataacttatttggcgctaccgcaaatgcaataagccagccttttcttcttggtgcaaccactaac
  S T G N A N T S N N L F G A T A N A N K P A F S F G A T T N
631 gacgataaaaaacagaaaccagacaagcctgttctccttcaattcaagtgtcggtaataagacagacgctcaagctcccactacagga
  D D K K T E P D K P A F S F N S S V G N K T D A Q A P T T G
721 ttttctttggttcacaactaggtggaacaaaacggtaaacgaggtgcaaacgcttcccttctcatttggttcaggatcagctgggtc
  F S F G S Q L G G N K T V N E A A K P S L S F G S G S A G A
811 aaccagctggagcttcgcaaccgaacctacaactaatgaaccagcaaacaccgcttcttcttggtagctgcaacatccgacaataag
  N P A G A S Q P E P T T N E P A A K P A L S F G T A T S D N K
901 acaactaacacaacccaagtttttctggttggtgtaaatcggatgaaaaataagctgggtgctacttcttaagcctgcttctcattcggt
  T T N T T P S F S F G A K S D E N K A G A T S K P A F S F G
991 gctaagccagaagaaaagaagatgataatcctcaaacaccagctttctcatttgggtgcaaatcaaatgaagacaagcaagatggaacg
  A K P E E K K D D N S S K P A F S F G A K S N E D K Q D G T
1081 gctaagccagcattttcctttggtgcaaacgcccgggagaagaataacaatgaaacctccaagcggcatttcttcttggagcaaaagtct
  A K P A F S F G A K P A E K N N N E T S K P A F S F G A K S
1171 gatgagaaaaaggatggtgatgcctcctaaacctgcttctcttggcgctaaaccggatgaaaaataagctagtgtacttctaaacct
  D E K K D G D A S K P A F S F G A K P D E N K A S A T S K P
1261 gccttctcattcggcgctaaagcagaagaaaagaagatgataatcctcaaacaccagcttctcatttgggtgcaaatcaaatgaagac
  A F S F G A K P E E K K D D N S S K P A F S F G A K S N E D
1351 aagcaagatggaacggctaagccagcattttcctttggtgcaaacgcccgggaaaagaataacaatgaaacttccaagccggcatttctc
  K Q D G T A K P A F S F G A K P A E K N N N E T S K P A F S
1441 tttggagcaaaagtcgatgagaaaaaggatggcgatgcctcctaaacctgccttctcatttgggtgcaaatcggatgaaaaaaggacagt
  F G A K S D E K K D G D A S K P A F S F G A K S D E K K D S
1531 gattctcgaagcctgccttctcatttggtaactaaatcgaatgaaaaaaaggacagtggttcttcgaagcctgcttctcattcgggtc
  D S S K P A F S F G T K S N E K K D S G S S K P A F S F G A
1621 aaaccggatgaaaagaagaatgatgaagctcacaagcctgccttctcattcggagcaaacgcaaacgaaaagaagaagatgaaatca
  K P D E K K N D E V S K P A F S F G A K A N E K K E S D E S
1711 aaatcagcctttcatttgggttcaagcctacaggaaggaaggcagtgggcgcaaggtgccatttcttgggtgctaaaccgcaa
  K S A F S F G S K P T G K E E G D G A K A A I S F G A K P E
1801 gaacagaaatccagtgatagcagcaagcagcgtttacttttgggtgctcaaaaagataatgagaagaaaacagagtgctga
  E Q K S S D T S K P A F T F G A Q K D N E K K T E C *

```

Plasmid name pSF847  
 Encoded protein His<sub>10</sub>-TEV-Nup57p<sup>1-233</sup>-Nup49p<sup>1-246</sup>-Cys  
 Features (nt) 4-33 His<sub>10</sub>-tag  
 40-60 TEV protease recognition site  
 76-771 Nup57p<sup>1-233</sup>  
 781-1515 Nup49p<sup>1-246</sup>

```

1 atgaccaccatcaccatcaccaccatcaccacggatccggagaaaacctgtacttccagggtacctccatggggttggtttcagcgg
M H H H H H H H H H H G S G E N L Y F Q G T S M G F G F S G
91 agtaataacgggttcggaaataaacagctgggttcgaccggtttttcatttggacaaaacaataacaatacaaaactcaaccttcggct
S N N G F G N K P A G S T G F S F G Q N N N N N T N T Q P S A
181 tcaggatttgggttggggcagccagcaaatctctgggacggctactaccggagggttgggtgcaaatcagccacaaatacttttggg
S G F G F G G S Q P N S G T A T T G G F G A N Q A T N T F G
271 agtaaccaacaagtagtacaggtggaggccttttcggtaataagcctgctccttggcagcctaggaagttcaagcactaccgcttcagg
S N Q Q S S T G G G L F G N K P A L G S L G S S T T A S G
361 actacagctactggaacaggtttatttgggcaacaaacagcacaacctcaacaatccaccattggagggttatttggaaacaagcca
T T A T G T G L F G Q Q T A Q P Q Q S T I G G G L F G N K P
451 actaccacaacgggaggtcttttcggcaacagtgcaaaaacaatagtagtaccacaagtggggtttatttggtaataaagtaggaccact
T T T T G G L F G N S A Q N N S T T S G G L F G N K V G S T
541 ggctcactgatggcggaatagcactcaaacacatctaacatgaatgcaggcggacttttgggtgcaaacgctcagaatactacagcg
G S L M G G N S T Q N T S N M N A G G L F G A K P Q N T T A
631 actacgggagggcctatttggcagtaagccacaaggatcaacaactaatggtgcctgtttggaagcggcaccagaataacaataccctt
T T G G L F G S K P Q G S T T N G G L F G S G T Q N N N T L
721 gggggaggtggcctttttggccaatcccagcagcctcaaaaacactgcgttcattgggttggattaaataaagcatcttcgacacct
G G G G L F G Q S Q Q P Q T N T A F M G F G L N K A S S T P
811 gcaggtgggctctttggtcaggccagcggagctagcactggaacgcgaataactgggttttcggttgggtgggactcaactggacaaaac
A G G L F G Q A S G A S T G N A N T G F S F G G T Q T G Q N
901 accggcccaagtagcaggtgactatttggcgtaaaccagccggtatctacaggaggattagggtcatcatttggtcagcagcaacaaca
T G P S T G G L F G A K P A G S T G G L G A S F G Q Q Q Q Q
991 tctcagacaaatgcatttggaggaagcggcaccaccggggggttttcggtaacaaacctcaacaatacggcgaacactggggggggg
S Q T N A F G G S A T T G G G L F G N K P N N T A N T G G G
1081 ttatttggcgctaattcgaacagtaattctggcagtttgggttccaacaatgcacagacgagtcgtggtttgttggtaataataac
L F G A N S N S N S G S L F G S N N A Q T S R G L F G N N N
1171 actaataatataataatagtagtgatggaatgaataatgcaagcgtggactatttggctcaaacctgaggaggcacttcttggctc
T N N I N N S S S G M N N A S A G L F G S K P A G G T S L F
1261 ggtaataacaagcactcttcggccctgcgcagaaaccaggcagatggttgggtgcaaaaccagctgttacatctctattcggcaataatgca
G N T S T S S A P A Q N Q G M F G A K P A G T S L F G N N A
1351 ggtaatacagcactgggtggaggttatttggctccaaaccgacaggagcaacgtcttgggttccatcaataaacaacaacaataac
G N T T T G G G L F G S K P T G A T S L F G S S N N N N N
1441 aataatagtaacaacatcatgagtgctcaggcgggtatttggtaatcagcagcagcaactgcagcagcaaccatggtga
N N S N N I M S A S G G L F G N Q Q Q Q L Q Q Q P C *

```



Plasmid name pSF851  
 Encoded protein His<sub>14</sub>-TEV-IBB-MBP-mEGFP  
 Features (nt) 1-78 His<sub>14</sub>-tag  
 79-96 TEV protease recognition site  
 103-288 *S. cerevisiae* Srp1p<sup>2-63</sup>  
 295-1395 Maltose-binding protein (MBP)  
 1408-2118 mEGFP

```

1 atgagcaagcatcaccatcattcaggccatcaccataccggacaccaccatcattcaggcagtcaccataccggcgagaacctgtat
M S K H H H H S G H H H T G H H H H S G S H H H T G E N L Y
91 tttcaaggatccgataatggtacagattcttccacgagcaagttcgttcccgaaatagacgaaacaaactttaagaataaaggcagattc
F Q G S D N G T D S S T S K F V P E Y R R T N F K N K G R F
181 tctgcagatgaactctgctgctgtagatagatacacaacagggtcgaattaagaaaagcaaaaagagatgaagctttggccaaaagaagaac
S A D E L R R R R R D T Q Q V E L R K A K R D E A L A K R R N
271 tttattcccccaactgatggtaccaaaactgaagaaggtaaactggaatctggattaacggcgataaaggctataacggctctcgtgtaa
F I P P T D G T K T E E G K L V I W I N G D K G Y N G L A E
361 gtcggtaagaattcagagaagataccggaattaaagtcaccggtgagcattccggataaactggaagagaattccacaggttgccgca
V G K K F E K D T G I K V T V E H P D K L E E K F P Q V A A
451 actggcgatggccctgacattatcttctgggcacacgaccgcttgggtgctacgctcaatctggcctggtggctgaaatcaccggac
T G D G P D I I F W A H D R F G G Y A Q S G L L A E I T P D
541 aaagcgttccaggacaagctgtatccgtttacctgggatgacctgacctacaacggcaagctgattgcttaccgatcgtgttgaagcg
K A F Q D K L Y P F T W D A V R Y N G K L I A Y P I A V E A
631 ttatcgtgatttatacaaaagatcgtgctgccaacccgcaaaaacctgggaagagatccggcgctggataaaagactgaaagcgaaa
L S L I Y N K D L L P N P P K T W E E I P A L D K E L K A K
721 ggtaaagcgcgctgattggtcaactgcaagaaccgtacttcaactggccgctgattgctgctgacgggggttatgcttcaagtatgaa
G K S A L M F N L Q E P Y F T W P L I A A D G G Y A F K Y E
811 aacggcaagtacgacattaaagcgtggcggtgataacgctggcgcaagcgggtctgaccttctggtgacctgataaaaaaaa
N G K Y D I K D V G V D N A G A K A G L T F L V D L I K N K
901 cacatgaatgagacaccgattactcctcgcagaagctgctttaaataaaggcgaacagcgatgacctcaacggccctggcgatgg
H M N A D T D Y S I A E A F N K G E T A M T I N G P W A W
991 tccaacatcgacaccagcaagtgattatggtgtaacggtaactgcccaccttcaagggtcaaccatccaacgcttctggtggcgctg
S N I D T S K V N Y G V T V L P T F K G Q P S K P F V G V L
1081 agcgcggtattaaacgcccagtcgcaacaagagctggcaaaagagttcctcgaaaactatctgctgactgatgaaagcttggaaagcg
S A G I N A A S P N K E L A K E F L E N Y L L T D E G L E A
1171 gttataaagacaacccgctgggtgcccgtgagctgaagcttctacgaggaagagttggcgaagatccacgtattgcccaccatggaa
V N K D K P L G A V A L K S Y E E E L A K D P R I A A T M E
1261 aacgccagaaaggtgaaatcatgccaacatcccgcagatgctcgtttctggtatgccgtgctactgctgctgacacgccgccagc
N A Q K G E I M P N I P Q M S A F W Y A V R T A V I N A A S
1351 ggtcgtcagactgctgatgaagccctgaaaagcgcgagactaatggcaccggaaccagcaagggcgaggagctgttaccgggggtggtg
G R Q T V D E A L K D A Q T N G T G T S K G E E L F T G V V
1441 cccatcctggtcagctggacggcgacgtaaacggccacaagttcagcgtgctccggcgagggcgagggcgatgccaccatcggcaagctg
P I L V E L D G D V N G H K F S V S G E G E G D A T Y G K L
1531 accctgaagtctcctgaccaccggcaagctgcccgtgcccctggcccaccctcgtgaccaccctgacctcaggcgctgacgtgcttcaagc
T L K F I C T T G K L P V P W P T L V T T L T Y G V Q C F S
1621 cgctacccccaccacatgaagcagcagcacttctcaagtcggccatgccgaaggtcactcaggagcgcaccatcttctcaaggac
R Y P D H M K Q H D F F K S A M P E G Y V Q E A R T I F F K D
1711 gacggcaactacaagaccgcccaggtgaagttcgagggcgacaccctggtgaaccgcatcgagctgaagggcactgacttcaaggag
D G N Y K T R A E V K F E G D T L V N R I E L K G I D F K E
1801 gacggcaactcctggggcacaagctggagtacaactacaacgccacaacgtctatatcatggccgacaagcagaagaacggcactcaag
D G N I L G H K L E Y N Y N S H N V Y I M A D K Q K N G I K
1891 gtgaacttcaagatcccaccacaacatcgaggacggcagcgtgacgctgcccaccactaccagcagaacacccccatcggcgacggcccc
V N F K I R H N I E D G S V Q L A D H Y Q Q N T P I G D G P
1981 gtgctgctgcccgacaaccactacctgagcaccagtcggcctgagcaaaagacccaacgagaagcgcgatcacatggtccttaaggag
V L L P D N H Y L S T Q S A L S K D P N E K R D H M V L K E
2071 ttcgtgaccgcccgggatcactctcgcatggacgagctgtacaagtaa
F V T A A G I T L G M D E L Y K *

```

Plasmid name pSF844  
 Encoded protein His<sub>14</sub>-TEV-MBP-mCherry  
 Features (nt) 1-78 His<sub>14</sub>-tag  
 79-96 TEV protease recognition site  
 103-1203 Maltose-binding protein (MBP)  
 1216-1917 mCherry

```

1 atgagcaagcatcaccatcattcaggccatcaccataccggacaccaccatcattcaggcagtcaccatcaccgacgagaacgtgat
M S K H H H H S G H H H T G H H H H S G S H H H T G E N L Y
91 ttccaggtaccacaaactgaagaaggtaaactggtaactctggattaacggcgataaaggctataacggctcgcgtgaagtcggtaagaaa
F Q G T K T E E G K L V I W I N G D K G Y N G L A E V G K K
181 ttccagaaagataccggaattaaagtcaccgttgagcatccggataaactggaagagaattcccacaggttgcggcaactggcgatggc
F E K D T G I K V T V E H P D K L E E K F P Q V A A T G D G
271 cctgacattatctctgggcacacgaccgctttggtggctacgctcaatctggcctgttgctgaaatcaccgggacaagcgttccag
P D I I F W A H D R F G G Y A Q S G L L A E I T P D K A F Q
361 gacaagctgtatccggttacctgggtgacgttacacggcaagctgattgcttaccggatcgcgtgtgaagcgttatcgcgtgatt
D K L Y P F T W D A V R Y N G K L I A Y P I A V E A L S L I
451 tataacaaagatctgctgccaacccgcaaaaacctgggaagagatccggcgctggataaagaactgaaagcgaaggttaagagcgcg
Y N K D L L P N P P K T W E E I P A L D K E L K A K G K S A
541 ctgatgttcaacctgcaagaaccttacctggccgctgattgctgacgggggtatgcgttcaagatgaaaacggcaagtac
L M F N L Q E P Y F T W P L I A A D G G Y A F K Y E N G K Y
631 gacattaaagacgtggcggtgataaacgctggcgcaaacggctgaccttccgttggacgtgataaaacaaacacatgaatgca
D I K D V G V D N A G A K A G L T F L V D L I K N K H M N A
721 gacaccgattactccatcgcagaagctgcctttaaataaggcgaaacagcagatgacctcaacggcccggtggcgatggtccaacatcgac
D T D Y S I A E A A F N K G E T A M T I N G P W A W S N I D
811 accagcaagtgaaattatggtgtaacggtactgcccacttcaaggggtcaacctccaacccgttcgttggcggtgagcgaggtatt
T S K V N Y G V T V L P T F K G Q P S K P F V G V L S A G I
901 aacgcccagtcgcaacaagagctggcaaaagagttcctcgaaaactatctgctgactgatgaaggtcggaaagcgggttaataaagac
N A A S P N K E L A K E F L E N Y L L T D E G L E A V N K D
991 aaaccgctgggtgcccgtgacgctgaagctctacgaggaagagttggcgaagatccacgtattgcccaccatggaaaacggccagaaa
K P L G A V A L K S Y E E E L A K D P R I A A T M E N A Q K
1081 ggtgaaatcatgccaacatccccgagatgtccgcttctggtatgcccgtgactgacggtgatcaacggccgacggcgtcgtcagact
G E I M P N I P Q M S A F W Y A V R T A V I N A A S G R Q T
1171 gtcgatgaagccctgaaagacgagcaactaatggcaccggaaccagcaagggcgaggaggataaacatggccatcatcaaggagttcatg
V D E A L K D A Q T N G T G T S K G E E D N M A I I K E F M
1261 cgcttcaaggtgacatggagggctccgtgaacggccacgagttcgagatcgagggcgagggcgagggcccccctacgagggcaccag
R F K V H M E G S V N G H E F E I E G E G E G R P Y E G T Q
1351 accgccaagctgaaggtgaccaaggggtggcccccctgcccctcgcctgggacatcctgtcccctcagttcatgtacggctccaagccctac
T A K L K V T K G G P L P F A W D I L S P Q F M Y G S K A Y
1441 gtgaagcaccggccgacatccccgactacttgaagctgtcctccccgagggcttcaagtgaggcggtgatgaacttcgaggacggc
V K H P A D I P D Y L K L S F P E G F K W E R V M N F E D G
1531 ggcgtggtgacctgacccagactcctccctcaggacggcgagttcatctacaagtgaaagctgacggcaccacactcccctccgac
G V V T V T Q D S S L Q D G E F I Y K V K L R G T N F P S D
1621 ggccccgtaatgcaagaagaagccatgggctgggaggcctcctccgagcggatgtaccccaggacggcgccctgaagggcgagatcaag
G P V M Q K K T M G W E A S S E R M Y P E D G A L K G E I K
1711 cagaggctgaagctgaaggacggcggcactacgacgctgaggtcaagaccacctacaaggccaagaagcccgtgcagctgccggcgcc
Q R L K L K D G G H Y D A E V K T T Y K A K K P V Q L P G A
1801 tacaacgtcaacatcaagttggacatcacctcccacaacgaggactacacatcgtggaacagtagaacgcggcgagggcgccactcc
Y N V N I K L D I T S H N E D Y T I V E Q Y E R A E G R H S
1891 accggcgcatggacgagctgtacaagtaa
T G G M D E L Y K *

```

Plasmid name pSF846  
Encoded protein His<sub>14</sub>-TEV-mCherry  
Features (nt) 1-78 His<sub>14</sub>-tag  
79-96 TEV protease recognition site  
103-804 mCherry

```
1 atgagcaagcatcaccatcattcaggccatcaccataccggacaccaccatcattcaggcagtcacaccataccggcgagaacctgat
M S K H H H H S G H H H T G H H H H S G S H H H T G E N L Y
91 tttcagggtaccagcaagggcgaggaggataaacatggccatcatcaaggagttcatgcgcttcaaggtgcacatggagggtccgtgaac
F Q G T S K G E E D N M A I I K E F M R F K V H M E G S V N
181 ggccacgagttcgagatcgagggcgagggcgagggcccctacgagggcaccagaccgccaagctgaaggtgaccaaggggtggcccc
G H E F E I E G E G E G R P Y E G T Q T A K L K V T K G G P
271 ctgcccttcgctgggacatcctgtcccctcagttcatgtacggctccaaggcctacgtgaagcaccgccgacatccccgactacttg
L P F A W D I L S P Q F M Y G S K A Y V K H P A D I P D Y L
361 aagctgtccttccccgagggttcaagtgaggcgcgctgatgaacttcgaggacggcggcgtggtgacctgacctcagactcctccctg
K L S F P E G F K W E R V M N F E D G G V V T V T Q D S S L
451 caggacggcgagttcatctacaaggtgaagctgcgcgccaccaacttcccctccgacggccccgtaatgcagaagaagaccatgggctgg
Q D G E F I Y K V K L R G T N F P S D G P V M Q K K T M G W
541 gaggcctcctccgagcggatgtaccccgaggacggcgcctgaagggcgagatcaagcagaggctgaagctgaaggacggcgccactac
E A S S E R M Y P E D G A L K G E I K Q R L K L K D G G H Y
631 gacgctgaggtcaagaccacctacaaggccaagaagcccgtgcagctgcccgccctacaacgtcaacatcaagttggacatcacctcc
D A E V K T T Y K A K K P V Q L P G A Y N V N I K L D I T S
721 cacaacgaggactacaccatcgtggaacagtacgaacgcgcccagggccgacctccaccggcggcatggacgagctgtacaagtaa
H N E D Y T I V E Q Y E R A E G R H S T G G M D E L Y K *
```

Plasmid name pSF856  
 Encoded protein His<sub>14</sub>-TEV-IBB-MBP-mCherry  
 Features (nt) 1-78 His<sub>14</sub>-tag  
 79-96 TEV protease recognition site  
 103-288 *S. cerevisiae* Srp1p<sup>2-63</sup>  
 295-1395 Maltose-binding protein (MBP)  
 1408-2109 mCherry

```

1 atgagcaagcatcaccatcattcaggccatcaccataccggacaccaccatcattcaggcagtcaccataccggcgagaacctgat
M S K H H H H S G H H H T G H H H H S G S H H H T G E N L Y
91 ttccaaggatccgataatggtacagattctccacgagcaagttcgttcccgaaatagacgaacaaactttaagaataaaggcagattc
F Q G S D N G T D S S T S K F V P E Y R R T N F K N K G R F
181 tctgcagatgaacttcgctcgtcgtagagatacacaacaggtcgaattaagaaaagcaaaaagagatgaagctttggccaaaagaagaac
S A D E L R R R R R D T Q Q V E L R K A K R D E A L A K R R N
271 tttattccccaactgatggtaccaaaactgaagaaggtaaactggaatctggattaacggcgataaaggctataacggctctcgtgaa
F I P P T D G T K T E E G K L V I W I N G D K G Y N G L A E
361 gtcggtaagaaattcgagaagataccggaattaaagtcaaccgttgagcatccggataaaactggaagaaattccacaggttcggcca
V G K K F E K D T G I K V T V E H P D K L E E K F P Q V A A
451 actggcagtgccctgacattatcttctgggacacgaccgcttgggtggctacgctcaatctggcctgttggctgaaatcaccgggac
T G D G P D I I F W A H D R F G G Y A Q S G L L A E I T P D
541 aaagcgttccagacaagctgtatccgtttacctgggactccgtacgttacaacggcaagctgattgcttaccggatcgctgttgaaaggc
K A F Q D K L Y P F T W D A V R Y N G K L I A Y P I A V E A
631 ttatcgctgatttataacaagatctgctgcccgaaccggcaaaaactgggaagagatcccgccgctggataaagaactgaaagcga
L S L I Y N K D L L P N P P K T W E E I P A L D K E L K A K
721 gtaagagcgcgctgatttcaacctgcaagaaccgtacttcaactggccgctgattgctgctgacggggttatcgcttcaagtatgaa
G K S A L M F N L Q E P Y F T W P L I A A D G G Y A F K Y E
811 aacggcaagtacgacattaaagcgtgggctggataacgctggcggcaaaagcgggtctgaccttccctgggtgacctgattaaaaaaa
N G K Y D I K D V G V D N A G A K A G L T F L V D L I K N K
901 cacatgaatgcagacaccgattactccatcgcagaagctgctttaaataaaggcaaacagcagatgaccatcaacggccctggggcatgg
H M N A D T D Y S I A E A A F N K G E T A M T I N G P W A W
991 tccaacatgcagaccagcaagtgaaattatggtgtaacggtactcgcgacctcaagggtcaaccatcaaaccttccgttggcgtgctg
S N I D T S K V N Y G V T V L P T F K G Q P S K P F V G V L
1081 agcgcaggtattaacggcccgctccgaacaaagagctggcaaaagagttcctcgaaaactatctgctgactgatgaaggtctggaagcg
S A G I N A A S P N K E L A K E F L E N Y L L T D E G L E A
1171 gtaataaagacaaccgctgggtgcccgtagcgtgaagctctacgaggaagagttggcgaagatccacgtattgcccaccatggaa
V N K D K P L G A V A L K S Y E E E L A K D P R I A A T M E
1261 aacggccagaagggtgaaatcatgccgaacatcccgcagatgtccgctttctggatgcccgtgctactgcccgtgatcaacggccgacc
N A Q K G E I M P N I P Q M S A F W Y A V R T A V I N A A S
1351 ggtcgtcagactgtcgatgaagccctgaaagacgcgagactaatggcaccggaaccagcaaggcgaggataacatggccatcatc
G R Q T V D E A L K D A Q T N G T G T S K G E E D N M A I I
1441 aaggagttcatgcttcaaggtgcacatggagggtcccgtgaacggccacgagttcagatcgagggcgagggcgagggccgcccctac
K E F M R F K V H M E G S V N G H E F E I E G E G E G R P Y
1531 gagggcaccagaccgccaagctgaaggtgaccaaggggtggcccctgcccttcgctgggacatcctgtcccctcagttcatgtacggc
E G T Q T A K L K V T K G G P L P F A W D I L S P Q F M Y G
1621 tccaagcctacgtgaagcaccggccgacatcccggactactgaaagctgtccttcccgagggttcaagtgaggcgctgatgaac
S K A Y V K H P A D I P D Y L K L S F P E G F K W E R V M N
1711 ttcgaggacggcggcgtggtgaccgtgaccagactcctccctgcaggacggcgagttcatctacaaggtgaagctgcccggcaccac
F E D G G V V T V T Q D S S L Q D G E F I Y K V K L R G T N
1801 ttcccctccgacggcccgtaaatgcagaagaagaccatgggctgaggcctcctccgagcggatgtaccggagggcggccctgaag
F P S D G P V M Q K K T M G W E A S S E R M Y P E D G A L K
1891 ggcgagatcaagcagaggtgaagctgaaggacggcggccactacgacgctgaggtcaagaccacctacaaggccaagaagcccgtgcag
G E I K Q R L K L K D G G H Y D A E V K T T Y K A K K P V Q
1981 ctgcccggcctacaacgtcaacatcaagttggacatcacctccacaacgaggactacacctcgtggaacagtagaacgcgcccag
L P G A Y N V N I K L D I T S H N E D Y T I V E Q Y E R A E
2071 ggcggcaactccaccggcggcatggacgagctgtacaagtaa
G R H S T G G M D E L Y K *

```

Plasmid name pSF881  
 Encoded protein His<sub>14</sub>-TEV-IBB-ZsGreen  
 Features (nt) 1-78 His14-tag  
 79-96 TEV protease recognition site  
 103-288 *S. cerevisiae* Srp1p<sup>2-63</sup>  
 295-987 ZsGreen

```

1 atgagcaagcatcaccatcattcaggccatcaccataccggacaccaccatcattcaggcagtcacaccataccggcgagaacctgtat
  M S K H H H H S G H H H T G H H H H S G S H H H T G E N L Y
91 tttcaaggatccgataatggtacagattcttccacgagcaagttcgttcccgaatatagacgaacaaactttaagaataaaggcagattc
  F Q G S D N G T D S S T S K F V P E Y R R T N F K N K G R F
181 tctgcagatgaacttcgctcgtagagatcacacaacaggtcgaattaagaaaagcaaaaagagatgaagctttggccaaaagaagaac
  S A D E L R R R R D T Q Q V E L R K A K R D E A L A K R R N
271 tttattcccccaactgatggtaccgctcagtcgaagcatggtctaaacaaaagaatgacaatgaaataccgtatggaagggtgcgtcgtat
  F I P P T D G T A Q S K H G L T K E M T M K Y R M E G C V D
361 ggacataaatttgtgatcacgggagaggcattggatatccgttcaaaaggaaacaggctattaatctgtgtgtggcgaaggtggacca
  G H K F V I T G E G I G Y P F K G K Q A I N L C V V E G G P
451 ttgccatttggcgaagacatattgtcagctgcctttatgtacggaaacagggttttccactgaatatcctcaagacatagctgactatttc
  L P F A E D I L S A A F M Y G N R V F T E Y P Q D I A D Y F
541 aagaactcgtcctcgtggttatacatgggacaggtcttttctttgaggatggagcagtttgcataatgtaatgcagatataacagtg
  K N S C P A G Y T W D R S F L F E D G A V C I C N A D I T V
631 agtgttgaagaaaactgcatgtatcatgagtcacaaatttatggagtgaattttccctgctgatggacctgtgatgaaaagatgacagat
  S V E E N C M Y H E S K F Y G V N F P A D G P V M K K M T D
721 aactgggagccatcctcgcgagaagatcataccagtacctaagcaggggatattgaaaggggatgtctccatgtacctccttctgaaggat
  N W E P S C E K I I P V P K Q G I L K G D V S M Y L L L K D
811 ggtggcggtttacgggtgccaattcgacacagtttacaagcaagctctgtgccaagaaagatgccggactggcacttccatccagcataag
  G G R L R C Q F D T V Y K A K S V P R K M P D W H F I Q H K
901 ctcaccctgaagaccgcagcgtatgtaagaatcagaatggcatctgacagaacatgctattgcatccggatcagccttgcctaa
  L T R E D R S D A K N Q K W H L T E H A I A S G S A L P *

```



Plasmid name pQE30 scImpβ  
 Encoded protein Kap95p-His<sub>6</sub>  
 Features (nt) 13-2595 scImpβ  
 2608-2625 His<sub>6</sub>-tag

```

1 atgagaggatccatgtccaccgctgaatttgctcaactattggagaacagtatcttaagtcccgacccaaacattcggttgactagttaa
M R G S M S T A E F A Q L L E N S I L S P D Q N I R L T S E
91 acgcaattaagaagaattatctaagacaacttctacaatttgcaggctcttctcgcgaagtgcttatcgatgaaatacaaaagctagaa
T Q L K K L S N D N F L Q F A G L S S Q V L I D E N T K L E
181 ggcgctattctagcggcgtaactttgaagaacgagctgggtgccaaggactcagtcgaagcgcagcaatttgcaacgctggattaca
G R I L A A L T L K N E L V S K D S V K T Q Q F A Q R W I T
271 caggttagtccagaagctaaaaacaaatataaaactaacgcgctgaccgcattggctccatagaaccgcgctatagcaaatgcagcagct
Q V S P E A K N Q I K T N A L T A L V S I E P R I A N A A A
361 caattgattggcgctatagcagatattgagttgccccatggcgatggccagagttgatgaaaattatggttgacaatcacaggtgcgcaa
Q L I A A I A D I E L P H G A W P E L M K I M V D N T G A E
451 caaccgaaaaatgtcaagagagcctcttattggccttgggttatatgtgtgaaagtgcagaccctcaaaagtcaagccttagttcttca
Q P E N V K R A S L L A L G Y M C E S A D P Q S Q A L V S S
541 tcaacaataatcttaactgctattgcccagggtgcccactctacggaactccaagcagtcagactggcagctctgactcttgca
S N N I L I A I V Q G A Q S T E T S K A V R L A A L N A L A
631 gactcttaattttcatcaaaaataacatggaacgcgaaggtgaaagaaactccttatgcaagctcgtctgtgaaagcactcaagctgaa
D S L I F I K N N M E R E G E R N Y L M Q V V C E A T Q A E
721 gatatagaagttcaagcagctgcctttgggtgtttgtgtaaaatcatgtcactatactatacattatgaaaccttcatggagcaagcc
D I E V Q A A A F G C L C K I M S L Y Y T F M K P Y M E Q A
811 ctatagcattgaccatagctacaatgaaatctccaatgataaagttagcttccatgactgtggaattctggccactatttgggaagaa
L Y A L T I A T M K S P N D K V A S M T V E F W S T I C E E
901 gaaatcgatattgctatgagctcgcctcaatttctcaatctcctttacagagttataaatttgcgtctctcttcttataaagatgttgc
E I D I A Y E L A Q F P Q S P L Q S Y N F A L S S I K D V V
991 ccaatttgggtgaaccttctaacgagacaaaatgaagatccagaagatgacgattggaatgttccatgcccaggtgcatgctgag
P N L L N L L T R Q N E D P E D D D W N V S M S A G A C L Q
1081 ttgtttgccaaaactgtggcaatcatatcttgaacctgtattggaatttggtaacaaaattaccgctgacaactggaggaatcgt
L F A Q N C G N H I L E P V L E F V E Q N I T A D N W R N R
1171 gaagctgctgtaattggcctttgggtccattatggatggccctgataaaggtccaagaacctattacgctcacaagccttaccattt
E A A V M A F G S I M D G P D K V Q R T Y Y V H Q A L P S I
1261 ttgaatttaataagcagatcaatccctacaagttgaagaaacactgctgtgtgattggtagaattgctgattctgttgcctatctatc
L N L M N D Q S L Q V K E T T A W C I G R I A D S V A E S I
1351 gaccacacacagcattctccaggtgctgctcaagcttggttaattgggttgcaagatcacccaaaagtggccacaaactgttcttgacc
D P Q Q H L P G V V Q A C L I G L Q D H P K V A T N C S W T
1441 attatcaacttagtcgaacaattagcagaagccacaccatctcaactctataacttctatcccgtctcttgataggttggatcgggtgct
I I N L V E Q L A E A T P S P I Y N F Y P A L V D G L I G A
1531 gcaaatagaattgataatgagttcaatgcccgctgcatccgcctttttagccttgacaacaatggttgaatagccacggacagcgtagct
A N R I D N E F N A R A S A F S A L T T M V E Y A T D T V A
1621 gaaactccgcctccatttctacgcttggatggacaattagggcagacaatgagtggtgatgaaaatcaattaacgcttagaagatgag
E T S A S I S T F V M D K L G Q T M S V D E N Q L T L E D A
1711 caaagtttgcaagaattgcagtcacaatattgactgttctagcagccggttattagaaaaagtcgaagtgtgagaacctgggttcagat
Q S L Q E L Q S N I L T V L A A V I R K S P S S V E P V A D
1801 atgcttatgggactgttcttcaggttgggtgaaaaaaaggactctgcttattgaaagcagatgttattatgctattttagcttagct
M L M G L F F R L L E K K D S A F I E D D V F Y A I S A L A
1891 gcttcttgggtgaaagatttgagaatactggaacattttctccctatttataaaggctttaaataagtagattcgccagtttca
A S L G K G F E K Y L E T F S P Y L L K A L N Q V D S P V S
1981 atcaccgcagtggttctatcgctgatatttcaaatctgtagaagaagatttcagaagatattccgatgctatgatgaatgtcttggct
I T A V G F I A D I S N S L E E D F R R R Y S D A M M N V L A
2071 caaatgatctctaatacgaatgcaaggagaggttgaaccagccgcttggagcgtgttcggtgatattgctccaatataaggtgctgat
Q M I S N P N A R R E L K P A V L S V F G D I A S N I G A D
2161 ttattccctacttgaatgacatcatggcgttgggtgtgtgctgtgcccacacgaagccggaaaacggcacattagaagccttgattat
F I P Y L N D I M A L C V A A Q N T K P E N G T L E A L D Y
2251 caaataaaagtactagaagcagtagcttagcttatgggtatagtagcgggtcttcatgataaacctgaagctctgttcccttatgtt
Q I K V L E A V L D A Y V G I V A G L H D K P E A L F P Y V
2341 ggtactatattccagttcattgcaagttgcagaagatcctcagctgtacagtgaggatgctacctcaagagcagcagctggattgatt
G T I F Q F I A Q V A E D P Q L Y S E D A T S R A A V G L I
2431 ggtgatagcagcagtggttccagcggctcaatcaacaattttatggacaagactgggttattgattacatataaagaactagaggt
G D I A A M F P D G S I K Q F Y G Q D W V I D Y I K R T R S
2521 ggccaattgttcagtcgaagccacaaaagatcacgcaagatgggctagagagcaacagaagcgtcaattatccttaggatccagatctcat
G Q L F S Q A T K D T A R W A R E Q Q K R Q L S L G S R S H
2611 caccatcaccatcactaa
H H H H H *

```



3511 attatcaatgatccggaccttttcaaaatgacaataggttttgttaataacgttttggacgtgaagccaggcttagctattggcagtaaa  
I I N D P D L L Q M T I G F V N N V L D V K P G L A I G S K  
3601 cattggacatcatttattttacctcaatttttaaaattaacacctcaagagaaaagttcacaattgttgcggtggcaaaattttgact  
H W T S F I L P Q F L K L I P S R E K F T I V A V A K F W T  
3691 aagttgatcaataataagaataacaaccaagaagaactcacaactgttaggcaacaagtttcctctataggaggagaccttgtgtaccaa  
K L I N N K K Y N Q E E L T T V R Q Q V S S I G G D L V Y Q  
3781 attatgtatggcttattccacacacaaggctccgatctgaatagttacacagatctgctaagagctttgtagccaagtttccaattgaa  
I M Y G L F H T Q R S D L N S Y T D L L R A L V A K F P I E  
3871 gcaagagagtggtcgttctgttttgcoccaaataatgtaacaatcctgcaggtcatgaaaaattattaataaattacttattacgaga  
A R E W L V A V L P Q I C N N P A G H E K F I N K L L I T R  
3961 ggaagcagagcagctggaaatgttattttgcagtgggtggttgattgtaccacacttccaattaccaaggataa  
G S R A A G N V I L Q W W L D C T T L P N Y Q G \*

Plasmid name pSF586  
 Encoded protein His<sub>10</sub>-GFP-TEV-Yrb4p  
 Features (nt) 4-33 His<sub>10</sub>-tag  
 40-751 GFP  
 763-784 TEV protease recognition site  
 790-4131 Yrb4p

1 atgcccaccatcaccatcaccaccatcaccacggatctagcaagggcgaggagctgttcaacgggggtggtgccatctctggtcgagctg  
 M H H H H H H H H H H H G S S K G E E L F T G V V P I L V E L  
 91 gacggcgacgtaaacggccaagttcagcgtgtccggcgagggcgagggcgatgccacctacggcaagtgacctgaagttcatctgc  
 D G D V N G H K F S V S G E G E G D A T Y G K L T L K F I C  
 181 accaccggcaagctgcccgtgacctggccaccctcgtgaccacctgacctacggcgtgacgtgcttcagccgctaccccgaccatg  
 T T G K L P V P W P T L V T T L T Y G V Q C F S R Y P D H M  
 271 aacgacgacgacttctcaagtcggccatgccgaaggtcagcggagcgcaccatcttctcaaggcagcggcaactacaagacc  
 K Q H D F F K S A M P E G Y V Q E R T I F F K D G N Y T Q  
 361 gcgcccggaggtgaagttcgaggggcagaccctggtgaaccgcatcgagctgaagggcagcacttcaaggaggcggcaacaactctgggg  
 R A E V K F E G D T L V N R I E L K G I D F K E D G N I L G  
 451 cacaagctggagtacaactacaacagccacaacgcttatatcattggccgacaagcagaagaacggcagcaggtgaacttcaagatccgc  
 H K L E Y N Y N S H N V Y I M A D K Q K N G I K V N F K I R  
 541 cacaacatcgaggacggcagcgtgcagctcggcaccactaccagcagaacacccccatcgggcagcggccccgtgctgctgcccgacaac  
 H N I E D G S V Q L A D H Y Q Q N T P I G D G P V L L P D N  
 631 cactacctgagcaccagtcggccctgagcaaacgcccacgagaagcgcgatcacatggtcctgctggagttcgtgaccgccgcccggg  
 H Y L S T Q S A L S K D P N E K R D H M V L L E F V T A A G  
 721 atcactctcgccatggacgaactgtacaagggggagctcgggtgaaaacctctactccaaggtaccatggatccaacaatttctaagt  
 I T L G M D E L Y K A G S S G E N L Y F Q G T M D Q Q F L S  
 811 caacttgagcaaaactttgacgctatcacttctggtgtaggctgaaggaggctacaaaaactttgcaaaactcaattttataccagcct  
 Q L E Q T L H A I T S G V G L K E A T K T L Q T Q F Y T Q P  
 901 acaactttgacgctttgatctcatatttgacgaacggctccgatgattcgttgaacaactagctggtggtgaagctagaagktggtt  
 T T L P A L I H I L Q N G S D D S L K Q L A G V E A R K L V  
 991 tccaagcactggaacgcccattgatgaatccactagaccctccatcaaacatctcttttacaacagcatttagtgacccaaaagaaaat  
 S K H W N A I D E S T R A S I K T S L L Q T A F S E P K E N  
 1081 gttcgtcattccaagcctcagtaattgcttctattggtactgaagagctagatggtaacaatggccagatttagctcctaaccatac  
 V R H S N A R V I A S I G T E E L D G N K W P D L V P N L I  
 1171 caaactctctggtgaagcgttcaacaagacaacactgcccatttttattttgcttctggtggaagattdcaacctctctctatct  
 Q T A S G E D V Q T R Q T A I F I L F S L L E E F T S S L S  
 1261 ggccacatcgatgacttttggctttgctctcagacaataatgatccatcttcttggagatcagatcattatctgccagggttg  
 G H I D D F L A L F S Q T I N D P S S L E I R S L S A Q A L  
 1351 aaccagtttctgctttgattgaagaacaagaaacccatcaacctgttcaagctcaaaaaactcggccgctcaattccaactcctggttaac  
 N H V S A L I E E Q E T I N P V Q A Q K F A A S I P S V V N  
 1441 gtttagacgcagttatcaagggcagcaccatgaacgctaataatctttaactgtttaaacgatttctgctattggactcccaa  
 V L D A V I K A D D T M N A K L I F N C L N D F L L L D S Q  
 1531 ttaacaggaactttattgtggattgattaagctgtcttacaactgtggttaaacagtgagattgacgaagatggtcagattttgct  
 L T G N F I V D L I K L S L Q I A V N S E I D E D V R V F A  
 1621 ctccaattcatcatatcttctattgtcctacagaaaatcgaaggtttctcaagcaaatggggccagaaaattactgttgctgctttgaag  
 L Q F T I S S L S Y R K S K V S Q S K L G P E I T V A L L K  
 1711 gtgcttgtgaagacgctgattgacgatgaatgaacaacgaagcgaacggcgaacggcgaacggcgaacggcgaacggcgaacggcgaac  
 V A C E E I D V D D E L N N E D E T G E N E E N T P S S S A  
 1801 attagactgttagcttctcctctgactgcccactccaggttgcctccgcttattgttgaacacattccagctattgcaatcc  
 L R L L A F A S S E L P P S Q V A S V I V E H I P A M L Q S  
 1891 gcaacgcttttgagagagagctattcttttagctatttccgctgctgttactggttctcagactacattttgtctcaatcgacaaa  
 A N V F E R R A I L L A I S V A V T G S P D Y I L S Q F D K  
 1981 attatcctgcccaccataaacggtttgaaggaactgaacggatgtttaaattagctgctgaaagtattccaactgaacccactgac  
 I I P A T I N G L K D T E P I V K L A A L K C I H Q L T T D  
 2071 ttacaagcgaagttgccaatttcatgaagaatacttgcactgatcatcgatcattgattctgcgaaaaacattgtcattttacaac  
 L Q D E V A K F H E E Y L P L I I D I I D S A K I V I Y N  
 2161 tatgcaactgttcttagatggtcgttgcgttgcattgcttgcattgctatgcctaaactggtgattgaaacaaactatctc  
 Y A T V A L D G L E F I A Y D A I A K Y L D P L M N K L F  
 2251 tatatgttggaaagtaataatcaatcaagttgagatggtgctgttcttgcgaattggttccgctgcttttgcagcaggttccgcttc  
 Y M L E S N E S S K L R C A V V S A I G S A A F A A G S A F  
 2341 attccatatttcaagactagtggtcactatttgaaaatcctcaaaaactgttctcaaatggaaggtatgagcgaagatgatatgaa  
 I P Y F K T S V H Y L E K F I Q N C S Q I E G M S E D D I E  
 2431 ctgaagggcaaaccttttgaatatttctactatggccagagcgtcagatcagacgcttttgcgaatttgcgaacctttggttaac  
 L R A N T F E N I S T M A R A V R S D A F A E F A E P L V N  
 2521 tccgctatgagggccatcaaacctgattctgctagattaagagaactcgggtatgcattcattgcaaaccttggcctaaagtttaccggcaa  
 S A Y E A I K T D S A R L R E S G Y A F I A N L A K V Y G E  
 2611 aattttcctccttcttgaactatctaccagaaatcttcaagacactagaattagatgaatccaactcaactcctgattggtgatgca  
 N F A P F L K T I L P E I F K T L E L D E Y Q F N F D G D A  
 2701 gaggattgaccgcatgtgctgattctgccaatgaagaagaactacagaacaaattcaccgttaacactgggtatttctctatgaaaggaa  
 E D L A A F A D S A N E E E L Q N K F T V N T G I S Y E K E  
 2791 gttgcttctcagctctatccgaattagcattgggtacgaagagcatttcttgcacatcgtcgaacaactcctaaaggtttgaaagaa  
 V A S A L S E L A L G T K E H F L P Y V E Q S L A G V L N E  
 2881 caagtcgatgagtcgtagcgtttaaagagaaccgctcctaaacaccatctggaatggttgaagtctgctgctggttggcttccaaagtagaa  
 Q V D E S Y G L R E T A L N T I W N V V K S V L L A S K V E  
 2971 ccagaagctatcctaaggtatccagcctctcctcactcgttaactcgaacactgctgatttggcggttattcaagctgcccagggaaactccatg  
 P E S Y P K G I P A S S Y V N A D V L A V I Q A A R E T S M  
 3061 ggttaactaaagcagtaattcgaaacctcaatggtcattaccgttattggaagatttggccaatgatgaagcaatttggcgcgaatcatc  
 G N L S D E F E T S M V I T V M E D F A N M I K F A E P L V I  
 3151 atcatggacaacggcactcttctatgctagaagctttgtgcatgcaagttcttagtgcttgaagggtaaccatacttgcctcaaacatt  
 I M D N G D S S M L E A L C M Q V L S V L K G T H T C Q T I  
 3241 gatatcgaggagcgttccaagagatgaagaattagacgcttctgaaacccaagcaactttacaagatggttgatttggaaagttctgtgc  
 D I E E D V P R D E E L D A S E T E A T L Q D V A L E V L V  
 3331 agtttatctcaagctttagctggtgattttgcaaaccttgcgaactcagaccggttggtttctggatttccaactcaaatccaag  
 S L S Q A L A G D F A K V F D N F R P V V F G F A T T C S K S K  
 3421 aataagagatcatccgctcgtgcccctcctgaattagctcaggtatgaaagaacaaatccttctcgttcatgaaatgctagaagcc  
 N K R S S A V G A A S E L A L G M K E Q N P F V H E M L E A

3511 ttagtcattagattaacaagcgataaatctttagaagtttagaggtaacgcgcttatgggtgtggtttggtgtgtaatatgcttctatg  
L V I R L T S D K S L E V R G N A A Y G V G L L C E Y A S M  
3601 gacatctcagccggtttatgaacctgtttgaaggcgctttatgagttactaagtgtgctgacctaaaggccttagcagccgaagatgac  
D I S A V Y E P V L K A L Y E L L S A A D Q K A L A A E D D  
3691 gaagccaccagagagattattgatagacatacgtaatgctagtgatgtgtggccagaatggctttgaagaacagtgtcttagttcca  
E A T R E I I D R A Y A N A S G C V A R M A L K N S A L V P  
3781 ttggaacaaactgtccagcattattggcacatttaccactaaacaccggttttgaagaatacaatccaatcttgcgaattgatcatgaaa  
L E Q T V P A L L A H L P L N T G F E E Y N P I F E L I M K  
3871 ctataccaggaaaatagtcctggtatcacaacgaaacccaaggatcatcgagattttcagtgctgtgtttaccaagaaaatgataga  
L Y Q E N S P V I T N E T P R I I E I F S A V F T K E N D R  
3961 attaaagttgaaaaggagtctactctaggtagggagagaatattgaaagattaaagcaattccaacccaagagatgaagcataaggtt  
I K L E K E S T L G R E E N M E R L K Q F Q T E E M K H K V  
4051 attgaattattgaagtatctaaacactacttacaacggaattgttgctcaaaatccggttttagctgcagtcattgcttga  
I E L L K Y L N T T Y N G I V A Q N P V L A A V I A \*

Plasmid name pSF587  
 Encoded protein His<sub>10</sub>-GFP-TEV-scImpβ  
 Features (nt) 4-33 His<sub>10</sub>-tag  
 40-751 GFP  
 763-784 TEV protease recognition site  
 790-3375 scImpβ

1 atgaccaccatcaccatcaccaccatcaccacggatctagcaagggcgaggagctgttcaccggggtggtgccatcctggtcgagctg  
 M H H H H H H H H H H H H H H G S S K G E E L F T G V V P I A L V E L  
 91 gacggcgacgtaaacggccacaagttcagcgtgtccggcgagggcgagggcgatgccacctacggcaagctgacctgaagttcatctgc  
 D G D V N G H K F S V S G E G E G D A T Y G K L T L K F I C  
 181 accaccgcaagctgcccgtgcccgtgcccaccctcgtagccaccctgacctacggcgtgcaactgctcagccgtaccccaccacatg  
 T T G K L P V P W P T L V T T L T Y G V Q C F S R Y P D H M  
 271 aagcagcagcacttctcaagtcggcatgcccgaaggctacgtccaggagcgcacctcttctcaaggacgacggcaactacaagacc  
 K Q H D F F K S A M P E G Y V Q E R T I F F K D D G N Y K T  
 361 cgcggcgaggtagaagttcagggcgacaccctggtgaaccgcatcgactgaagggcactcgactcaaggaggacggcaacatcctgggg  
 R A E V K F E G D T L V N R I E L K G I D F K E D G N I L G  
 451 cacaagctggagtacaactacaaccacacacgcttatcatggccgacaagcagaagcggcattcaagctgaactcaagaccgc  
 H K L E Y N Y N S H N V Y I M A D K Q K N G I K V N F K I R  
 541 cacaacatcgaggacggcagcgtgacgtcggcaccactaccagcagaacacccccatcgggcagggcccctgctgctgccgacaac  
 H N I E D G S V Q L A D H Y Q Q N T P I G D G P V L A L P D N  
 631 cactacctgagcaccagctccgcccctgagcaaacgcccacgagaagcggcagcactgctgctggagttcgtgaccgccggcg  
 H Y L S T Q S A L S K D P N E K R D H M V L L E F V T A A G  
 721 atcactctggcagcagcactgtacaagggggagctgaaaaacctctactccaaggtaccatgcccaccgctcacttctgct  
 I T L G M D E L Y K A G S S C G E N L Y F Q G T M S T A E F A  
 811 caactatggagaacagtagtcttaagtcgcccaaacatcggtgactagtgaacgcaattaaagaaattatctaatagcaactc  
 Q L L E N S I L S P D Q N I R L T S E T Q L K K L S N D N F  
 901 ttacaatttgaggctcttcttccgaagcttatcgatgaaaatacaaaagctagaagggcgtattctagcggcgctaaccttgaagaac  
 L Q F A G L S S Q V L I D E N T K L E G R I L A A L T L K N  
 991 gagctggtgtccaaggactcagtcgaagcgcagcaatttgcaaacgctggattacacaggttagtccagaagctaaaaaccaaataaa  
 E L V S K D S V K T Q Q F A Q R W I T Q V S P E A K N Q I K  
 1081 actaacgcgctgaccgactggtcctcatagaaccgctatagcaaatgcagcagctcaattgattgctgagcctatagcagatattgagtg  
 T N A L T A L V S I E P R I A N A A A Q L I A A I A D I E L  
 1171 cccctggcagcaggtgagtaaaattatggtgacaaatagcaggtgccaacacagcaaaatgtcaagagagcctcttattg  
 P H G A W P E L M K I M V D N T G A E Q P E N V K R A L L L  
 1261 gcctgggttatatgtgtaaaagtcgagaccctcaagtcgaagccttagttctctcatcaacaatatctaatcgctattgcccagggt  
 A L G Y M C E S A D P Q S Q A L V S S S N N I L I A I V Q G  
 1351 gcgcaatctacgaaacttcaaacgagtcagactggcagctgctgactgctccttgcagactctttaaattttcatcaaaaataacatggaa  
 A Q S T E T S K A V R L A A L N A L A D S L I F I K N N M E  
 1441 cgcgaagtgaaagaaactaccttatgcaagtcgctgtagaagcactcaagctgaagatatagaagttcaagcagctgcttgggtg  
 R E G E R N Y L M Q V V C E A T Q A E D I E V Q A A A F G C  
 1531 ttgtctaaaatcatgtcactatactatacattatgaaacctacatggagcaagccctatagcattgaccatagctacaatgaaatct  
 L C K I M S L Y Y T F M K P Y M E Q A L Y A L T I A T M K S  
 1621 ccaaatgataaagtagcttccatgactgtggaattctggtccactatttggagaagaatcgatattgcctatgagctcgctcaattt  
 P N D K V A S M T V E F W S T I C E E E I D I A Y E L A Q F  
 1711 cctcaatctcctttacagagttataaattcgcctctctcttataaagatggtgtcccaatttggtaaccttcaacgagacaaaat  
 P Q S P L Q S Y N F A L S S I K D V V P N L L N L L T R Q N  
 1801 gaagctccagaagatgacgattggaatggttccatgctccgaggtgcatgcttgcagttggttggccaaaatctggcaaatcattctta  
 E D P E D D D W N V S M S A G A C L Q L F A Q N C G N H I L  
 1891 gaacctgtattggaatttggtaacaaaatattaccgctgacaactggaggaaatcgtaagctgctgtaattggccttgggtccattatg  
 E P V L E F V E Q N I T A D N W R N R E A A V M A F G S I M  
 1981 gatggccctgataaggtccaagaacctattacgttccaccagcttaccatctatttgaatttaacgacgatacattgcaaaatgcaaaatg  
 D G P D K V Q R T Y Y V H Q A L P S I L N L M N D Q S L Q V  
 2071 aaggaaaccactgcttgggtgattgtagaattgctgattctgctgactatcgaccacacacagcattcctcaggtgctgctcaaa  
 K E T T A W C I G R I A D S V A E S I D P Q Q H L P G V V Q  
 2161 gcttgttaattgggtgcaagatcaccacaagtgcccaaacattgcttggaccattatcaacttgcgaacaattagcagaagcc  
 A C L I G L Q D H P K V A T A N C S W T I I N L V E Q L A E A  
 2251 acaccatctccaatctataacttctatcccgtcttctgtagatgggttgcaggtgctgcaaatagaattgataatgagttcaatgccgt  
 T P S P I Y N F Y P A L V D G L I G A A N R I D N E F N A R  
 2341 gcatccgcttctcagccttgacaacaatggtgaaatcgcaccagcagcagctgaaacttccgctccattctacgtttgttatg  
 A S A F S A L T T M V E Y A T D T V A E T S A S I S T F V M  
 2431 gacaaataggggcagacaatgagtggtgatgaaatcaattaacgttagaagatgcccaggttgcagaatgacgtcaaatatattg  
 D K L G Q T M S V D E N Q L T L E D A Q S L Q E L Q S N I L  
 2521 actgttctagcagccttattagaaaaagtcgaagtagtgagaacgggtgacagatgcttatgggactgcttctcaggttgttgaa  
 T V L A A V I R K S P S S V E P V A D M L M G L F F R L L E  
 2611 aaaaaggactcctgcttattgaaagcagatggtttatgctatttccagctctagctgcttcttgggtaaggattgcaaaatcacctg  
 K K D S A F I E D D V F Y A I S A L A A S L G K G F E K Y L  
 2701 gaaacttttccctatttataaaggctttaaactcaagtagattcggcagtttcaatcaccgagtggttctcagctgatatctca  
 E T F S P Y L L K K A L N Q V D S P V S I T A V G F I A D I S  
 2791 aattcgttagaagaagattcagaagatattccgatgctatgatgactgcttggctcaaatgatctcaatccaatgcaagagagag  
 N S L E E D F R R Y S D A M M N V L A Q M I S A N P N A R R E  
 2881 ttgaaaccagccttctgagcgtgctggtgatattgcttccaatataggtgctgatttattccctacttgaatgacatcatggcgtt  
 L K P A V L S V F G D I A S N I G A D F I P Y L N D I M A L  
 2971 tgtgttgcctcccaaacacagcagcggcaaacggcacattagaagcccttgattatcaataaaagtaactagaagcagtagct  
 C V A A Q N T K P E N G T L E A L D Y Q I K V L E A V L D A  
 3061 tatgtgggtatagtagcgggtcttcatgataaacctgaagctctgttcccttatggtgactatattccagttcattgcacaagttgca  
 Y V G I V A G L H D K P E A L F P Y V G T I F G I A Q V A  
 3151 gaagctcctcagctgtacagtgaggtgctaccctcaagcagcagcagctggattgattggtgatatagcagcagcttccagcagcgtc  
 E D P Q L Y S E D A T S R A A V G L I G D I A A M F P D G S  
 3241 atcaaacatttttgacaagactgggttattgattacattaaaagaaactaggagtgccaatttggcagtcgaagcccaaaaatataca  
 I K Q F Y G Q D W V I D Y I K A R T R S G Q L F S Q A T K D T  
 3331 gcaagatgggtagagcaacagaagcgtcaattatccttaa  
 A R W A R E Q Q K R Q L S L \*

Plasmid name pSF588  
 Encoded protein His<sub>10</sub>-GFP-TEV-Pse1p  
 Features (nt) 4-33 His<sub>10</sub>-tag  
 40-751 GFP  
 763-784 TEV protease recognition site  
 790-4059 Pse1p

1 atgcaccaccatcaccatcaccaccatcaccacggatctagcaagggcgaggagctgttcaccggggtggtgccctcctggtcgagctg  
 M H H H H H H H H H H G S S K G E E L F T G V V P I L V E L  
 91 gacggcgacgtaaacggccacaagttcagctgtccggcgaggcgaggcgatgccacctacggcaagctgacctgaagttcatctgc  
 D G D V N G H K F S V S G E G E G D A T Y G K L T L K F I C  
 181 accaccggcaagctgcccgtgccctggcccaccctcgtgaccaccctgacctacggcgtgagctgcttcagccgctaccgccaccacatg  
 T T G K L P V P W P T L V T T L T Y G V Q C F S R Y P D H M  
 271 aagcagcagacttctcaagtcgccatgccggaagctacgctccaggagcgcaccactcttctcaaggacgacggaactacaagacc  
 K Q H D F F K S A M P E G Y V Q E R T I F F K D D G N Y K T  
 361 cgcggcgagggtgaagttcgagggcgacaccctggtgaaccgcatcgagctgaagggcagctgacttcaaggaggcggcaacatcctgggg  
 R A E V K F E G D T L V N R I E L K G I D F K E D G N I L G  
 451 cacaagctggagtaacaactacaacagccacaacgtctatatcatggccgacaagcagaagaacggcatcaagtgtaactcaagatccgc  
 H K L E Y N Y N S H N V Y I M A D K Q K N G I K V N F K I R  
 541 cacaacatcgaggagcggcagctgcagctcggcaccactaccagcagaacacccccatcgggcagcccccgtgctgctgcccgacaac  
 H N I E D G S V Q L A D H Y Q Q N T P I G D G P V L L P D N  
 631 cactacctgagcaccagtcggcctgagcaaacgcccacgagaagcggcgcgacatcacatggctcctgctggagttcgtgaccgcccggg  
 H Y L S T Q S A L S K D P N E K R D H M V L L E F V T C C A A G  
 721 atcactctcgccatggcgaactgtacaagcggggagctcggtgaaacctctactccaaggtaccatgctgctgtctaccggagaa  
 I T L G M D E L Y K A G S S G E N L Y F Q G T M S A L P E E  
 811 gttaatagaacattacttcagattgtccagggcgtttgcttcccctgacaatcaaatcgttctgtagctgagaaggctcttagtgaagaa  
 V N R T L L Q I V Q A F A S P D N Q I R S V A E K A L S E E  
 901 tggattaccgaaaacaatattgagatcttcttaactttttggctggaacaagcggccttctcccaagatacaacagttgacgattatct  
 W I T E N N I E Y L L T F L A E Q A A F S Q D T T V A A L S  
 991 gctgttctgttttagaaaattagcattaaaagctccccctcttcgaagcttatgattatgtccaaaaatcacacatattaggaagaa  
 A V L F R K L A L K A P P S S K L M I M S K N I T H I R K E  
 1081 gttcttgcacaaatctgttcttcttattgtaaaagggtttttgctggaagagctgattcaattagcacaactatctgatgctattgct  
 V L A Q I R S S L L K G F L S E R A D S I R H K L S D A I A  
 1171 gagtgttcaagcagacttaccagcatggccagaattactacaagctttaaataagactctttaaagagcgttaacccaatttttagagaa  
 E C V Q D D L P A W P E L L Q A L I E S L K S G N P N F R E  
 1261 tccagtttagaattttgacgactgtaaccttatttaattaccgctggtgacatcaacagatcttaccatttttcaatcagggcttact  
 S F R I L T T V P Y L I T A V D I N S I L P I F Q S G F T  
 1351 gatgcaagtgataatgtcaaaattgctgcagttaccgcttctcgtgggtatttttaagcaactaccaaaactcgtggttccaagtttagt  
 D A S D N V K I A A V T A F V G Y F K Q L P K S E W S K L G  
 1441 attttattaccaagttttgaaatgattttaccaagatttttagatgatggttaaggacgatgcccttgcatcagttttgaaatcgtaatt  
 I L L P S L L N S L P R F L D D G K D D A L A S V F E S L I  
 1531 gagttvggaattggcaccaaaactatcaaggatattgttgccaataatacaattcactgatattggtataaaaaaataaggattta  
 E L V G E L A P K L F K D M F D Q I I Q F T D M V I K N K D L  
 1621 gaacctcagcaagaaccacagcactcgaactgtaaccgttttcagcggagaacgctccccaaatgtgtaaatcgaaccagaattacggg  
 E P P A R T T A L E L L T V F S E N A P Q M C K S N P N F R E  
 1711 caaacttttagtgatggttactttatcatgatgacggaggtatccatagatgatgatgacgagcaatggatagaatctgacgatacc  
 Q T L V M V T L I M M T E V S I D D D D A A E W I E S D D T  
 1801 gatgatgaagagttacatattgaccacgctcgtcaagctcttgatcgtggtttaaagcgtggatgaaattttgctgcacca  
 D D E E E V T Y D H A R Q A L D R V A L K L G G E Y L A A P  
 1891 ttgttcaatatttacgcaaatgatcacatcaaccgaatggagagaagattcggggccatgatggcacttccctcgcagctgagggt  
 L F Q Y L Q Q M I T S T E W R E R F A A M M A L E Q S A E G  
 1981 tgtgctgatgttctgatcggcgagatcccaaaaactcgtgattggaattccctcatcaacgatccctccaagagcagatgatgga  
 C A D V L I G E I P K I L D M V I P L I N D P H P R V Q Y G  
 2071 tgttgaatgtttgggtcaaatatctactgatttttaccattcattcaagaactgcacacgatagaattttgcccggctttaatctc  
 C N V L G Q I S T D F S P F I Q R T A H D R I L P A L I S  
 2161 aaactacgctcagaatgcacctcaagagttcaaacgacggcggcctcgtgtaacttttctgaattcgttcaagagatattctt  
 K L T S E C T S R V Q T H A A A A L V N F S E F A S G D I L  
 2251 gagccttacttgatagctattgacaaaattattagttttattacaagcaaaaactttacgtacaggaacggccctaaacacatt  
 E P Y L D S L L T N L L V L L T Q S N K L Y V Q G G L A T T I  
 2341 gcatttatgctgaagctgcaagaataaatttatcaagattacgatctctaagtcattatattaaatgtttgaaggttaacaat  
 A F I A E A A K N K F I K Y Y D T L M P L L L N V L K V N N  
 2431 aaagataatggtgtttgaaaggtaaatgtagaatggaatgtagcactctgattggttttggcgttggtgaaataatctcagacactc  
 K D N S V L K G K C M E C A T L I G F A V G K E K F H E H S  
 2521 caagagctgatttctatattggtcgtttcaaaaactcagatcgcgatgaagatgatgagcctcagatcacttgaacaaagtggagc  
 Q E L I S I L V A L Q N S D I D E D D A L R S Y L E Q S W S  
 2611 aggatttggcgaattctgggtgatgattttgttccgttggtaaccgattgttataaccacctgctaattactgccaagcaacgcaag  
 R I C R I L G D D F V P L L P I V I P P L L I T A K A T Q D  
 2701 gtcggtttaattgaagaagaagaagcagcaaaattccaacaataccagattgggatggttgcagttcagggaaaacacattgctatt  
 V G L I E E E E A A N F Q Q Y P D W D V V Q V Q G K H I A I  
 2791 cacatacgtccttgacgataaagatcagcaatggagctattacaagctatgacacacttttaagagggcaattttgctgtatattgt  
 H T S V L D D K V S A M E L L Q S Y A T L L R G Q F A V Y V  
 2881 aaagaatgaagaagaatagctctaccatcgttacttttaacctacatgacgggtgcttctgctgaggaacactttaaattcctatt  
 K E V M E E I A L P S L D F Y L H D G V R A A G A C T L I P I  
 2971 ctattatctgttacttgacgccaccggactcaaacgaggaattggtattggttggcataaagctcgtctcaactaaatcggggc  
 L S C L L A A T G T Q N E E L V L L W H K A S S K L I G G  
 3061 ttaattgcagaaccaatgccagaataacgcaagtttatcacaactcgttagtggaattaaagtcaggggtgacaattgcttaagc  
 L M G S E P M P E I T Q V Y H N S L V N G I K V M G D N C L S  
 3151 gaagaccaattagcggcatttactaagggtgctccggcaacttaactgacacttacgaaagatgacagatgagcattggtgatggtgat  
 E D Q L A A F T K G V S A N L T D T Y E R M Q D R H G D G D  
 3241 gaataatgaataatttgatgaagaggaagacttactgcaagatctctcgcgatgaatcaacaagctcactcggcggcgtttgaaa  
 E Y N E N I D E E E D F T D E D L L D E I N K S I A A V L K  
 3331 accacaatggctcattatctaaagaatttggagaatatatggcctatgataaacacattccttttagataatgaacaaatttagtcatt  
 T N G G H Y L K N L E N I W P M I N T F L L D N E P I L V I  
 3421 tttgcttagtagtattggtgacttattcaatattggggcgaacaactgctagcatgaagaacgcaatttattcaaggttaccgag  
 F A L V V I G D L I Q Y G G E Q T A S M K N A F I P K V T E  
 3511 tgcttgatttctctgacgctcgtattgccaaagctcctcttataatcggtggttggcccaaatcagctccatctacatgctgac  
 C L I S P D A R I R Q A A S Y I I G V C A Q Y A P S T Y A D

3601 gttgcataccgacttttagatacacttggtcagattgtcgatgtttccaggctccaactggaagaaatcgttcttcaacagagaatgcc  
V C I P T L D T L V Q I V D F P G S K L E E N R S S T E N A  
3691 agtgcagccatcgccaaaattctttatgcatacaattccaacattcctaacgtagacacgtacacggctaattggttcaaacgttacca  
S A A I A K I L Y A Y N S N I P N V D T Y T A N W F K T L P  
3781 acaataactgacaagaagctgcctcattcaactatcaatgtttgagtcattgattgaaaataattcgccaattgtgtgtgctcaatct  
T I T D K E A A S F N Y Q F L S Q L I E N N S P I V C A Q S  
3871 aatatctccgctgtagttgattcagtcatacaagccttgaatgagagaagtttgaccgaaaggaaggccaaacggtgataagttcagtt  
N I S A V V D S V I Q A L N E R S L T E R E G Q T V I S S V  
3961 aaaaagttgtgggatttttgccttctagtgatgctatggcaattttcaatagatatccagctgatattatgggaaaagtacataaatgg  
K K L L G F L P S S D A M A I F N R Y P A D I M E K V H K W  
4051 ttgcataa  
F A \*



Plasmid name pSF879  
 Encoded protein His<sub>10</sub>-GFP-TEV-Crm1p  
 Features (nt) 4-33 His<sub>10</sub>-tag  
 40-751 GFP  
 763-784 TEV protease recognition site  
 793-4047 Crm1p

1 atgaccaccatcaccatcaccaccatcaccacggatctagcaagggcgaggagctgttaccggggtggtgccatcctggtcgagctg  
 M H H H H H H H H H H H H H H G S S K G E E L F T G V V P I L L V E L  
 91 gacggcgacgtaaacggccacaagtccagcgtgtccggcgagggcgagggcgatgccacctacggcaagctgacctgaagtccatctgc  
 D G D V N G H K F S V S G E G E G D A T Y G K L T L K F I C  
 181 accaccggcaagctgcccggtgccctggcccaccctcgtgaccaccctgacctacggcgtgagctgttcagccgctaccggaccacatg  
 T T G K L P V P W P T L V T T L T Y G V Q C F S R Y P D H M  
 271 aagcagcagcacttctcaagtcgcatgcccgaaggtcagctcagggagcgcaccatcttctcaaggacgacggcaactacaagacc  
 R A E V K F E G D T L V N R I E L K G I D F K E D G N I L G  
 361 cgcggcgaggtgaaagtccgagggcgacaccctggtgaaccgcatcgagctgaagggcagctcactcaaggagacggcaacatctgggg  
 R A E V K F E G D T L V N R I E L K G I D F K E D G N I L G  
 451 cacaagctggagtacaactacaacgcccacaacgtctatcatggccgacaagcagaagaacggcagctcaaggtgaactccaagatccgc  
 H K L E Y N Y N S H N V Y I M A D K Q K N G I K V N F K I R  
 541 cacaacatcgaggagcggcagcgtgagctcggcaccactaccagcagaacacccccatcgggcagggccccgtgctgctgccgacaac  
 H N I E D G S V Q L A D H Y Q Q N T P I G D G P V L P D N  
 631 cactacctgagcaccagtcgcccctgagcaagaccaccaacgagcggcagctcacatggtcctgctggagttcgtgaccgcccggg  
 H Y L S T Q S A L S K D P N E K R D H M V L L E F V T A A G  
 721 atcactctcggcatggacgaactgtacaaggggggagctcgggtgaaaacctctactccaaggtaccggtatggaagaaatgttgat  
 I T L G M D E L Y K A G S S G E N L Y F Q G T G M E G I L D  
 811 ttttctaagcacttagatctcgtctctatagatcaggtggtatctacattctatcaaggttcaggttcagcaaaaagcaagcccaagag  
 F S N D L D I A L D Q V V S T F Y Q G S G V Q Q K Q A Q E  
 901 attttgactaaatccaagataatccagacgcttggcaaaaagctgaccaaattctcaattctcaactaacctcaatcaaaatattt  
 I L T K F Q D N P D A W Q K A D Q I L Q F S T N P Q S K F I  
 991 gccctttccatccttgataaataattactagaaaatgaaatgttgcgcaatgatcatagaattggaattaggaactctggtgtggt  
 A L S I L D K L I T R K W K L L P N D H R I G I R N F V V G  
 1081 atgattatctccatgtgccaagacgatgaagtattttaaacaacaaaagaacctgatcaataagtcggactgactttggtccaaatttta  
 M I I S M C Q D D E V F K T Q K N L I N K S D L T L V Q I L  
 1171 aagcaggaatggcctcagaattggcctgaattatcccagaactaatcggcagttcaagttcctctgtaattgtttgtgaaataaacatg  
 K Q E W P Q N W P E F I P E L I G S S S S S V N V C E N N M  
 1261 atcgctttgaaactgctatccgaagaagctctcagatttctcggcaacaaatgacacaagctaaagcttcaatgttgaataatccatg  
 I V L K L L S E E V F D F S A E Q M T Q A K A L H L K N S M  
 1351 tcaaaaagaatttgaacagatttttaaattatgttttcaagtttggacaaggttctcaagctctcaatagtggcaaccttagaatct  
 S K E F E Q I F K L C F Q V L E Q G S S S L I V A T L E S  
 1441 ttactgagatattacattggattccttatcgttatatttaaaccaaatatttggaaattattaagcaccaaatccatgacatcgcct  
 L L R Y L H W I P Y R Y I Y E T N I L E L L S T K F M T S P  
 1531 gatcaagagccatcacattgaaatgtttgactgaggtttcaaatctaaaaatccacaagataatgattgataaaaagcaactgta  
 D T R A I T L K C L T E V S N L K I P Q D N D L G A K R Q T V  
 1621 cttttttccaaaatactctacaacaaatggccacaagtgatgcccgtgactgccgatctgaaagccacttatgcaaatgctaacggt  
 L F F Q N T L Q Q I A T S V M P V T A D L K A T Y A N A N G  
 1711 aatgatcaatctttctacaagattttagcaatgtttctcaactatctcgtcgtgtaagggccctctagagatgatgaatcgtta  
 N D A G T S F L Q D L A M F L T T Y L A R N R A L L E S D E S T  
 1801 agagqgtgttgatgacgacccaacttaactcaatctcaaaaatcgaagaagagaactatttaagcagacattggactggy  
 R E L L N A H Q Y L I Q L S K I E E R E L F K T T L D Y W  
 1891 cataattagtagcagatgttttatgaggttcagcgtttgpcctgctaccgaaatgagccattgatcacagttatcagtcggtccacaa  
 H N V A D L F Y E V Q R L Q A T E M S P L I Q L S P Q  
 1981 gctatctcaactggatctggcgcctaaatccggaatataatgaaaagatttccattaaaaaacatatttaccagaagaattgttccag  
 A I S T G S G A L N P E E Y M K R F P L K K H I Y E E I C S Q  
 2071 ttgagattggtcattattgaaatattggttagaccagaagaagtccttgggtgaaatgatgaaggagaatgttagagagttcgt  
 L R L V I I E N M V R P E E V L V V E N D E G E I V R E F V  
 2161 aaagaatcagacactatccaattatacaaaatcagaagaagaggttcttctgatatattgaccatttgaatgttatcgatcagaagaatc  
 K E S D T I Q L Y K S E R E V L V Y L T H L N V T E E I  
 2251 atgatcagtaaatggcaaggcaaatcgatggttccgaatggtcagcacaatcaacactttatctgggctattggttccatctc  
 M I S K L A R Q I D G S E W S W H N I N T L S W A I G S I S  
 2341 ggtacaatgagcaagatactgaaaaaggtttgttagttactgttattataagatttactagatttaacggtaagaagaagggtaaaagt  
 G T M S E D T E K R F V V T V I K D L L D L T V K K R G K D  
 2431 aataaagctgtgtgcatcggatattatgtacgtcgtggccaatctcagattttgaaaggtcactggaattttctaaagaacagtt  
 N K A V V A S D I M Y V V G Q Y P R F L K A H W N F L R T V  
 2521 attttgaactttttgaatttatgcatgaaactcagagggttccagatattgcatgacacattcattaaagattgtccaaaatgt  
 I L K L F E F M H E T H E G V Q D M A C D T F I K I V Q K C  
 2611 aaatatactttgttattcaacaaccccgtagctcagcctttcatccaacaataataggatattcaaaagacaactgctgacct  
 K Y H F V I Q Q P R E S E P F I Q T I I R D I Q K T T A D L  
 2701 cagccgcaacagttccatacattttacaaggcttgggtattattttctgaagaaagaagcgtgagggagagaatagattttaagt  
 Q P Q Q V H T F Y K A C G I I I S E E R S V A E R N R L L S  
 2791 gatttgatgcaactgcaaatatggctgggacactatagtggaacaatccactgctaacccaacattggtttagattctgaaactgct  
 D L M Q L P N M A W D T I V E Q S T A N P T L L D S E T V  
 2881 aaaatattgcaaatattataaaaaccaatgtagctgctgcacctcaatgggagcagatttctatccacagttgggtcacatctattac  
 K I I A N I I K T N V A V C T S M G A D F Y P Q L G H I Y Y  
 2971 aatatgctcagctatacagagctgtttctcgtatgatttctcgtcctcaagttggcgcagaaggtctaatgctacagaagacccaaggtt  
 N M L Q L Y R A V S S M I S A Q V A A E G L I A T K T P K V  
 3061 cgtggttggaaacatcaaaaagagattctgaagctggtgagacctatataccaagggcagaatattggtatgdtcgtttaaagtg  
 R G L R T I K K E I L K L V E T Y I S K A R N L D G T V K V  
 3151 ttagttgagccattattgaacgctgacttgaagactatataaacaacgctcctgatgcaagggcagccgaagtgctaaatgtatgaca  
 L V E P L L N A V L E D Y M N N V P D A R D A E V L C N M T  
 3241 acagtagtagaaaaggttggatcatatgctccacaaggtgttattttaaatttacagagtgattttgaaatgcaactttggacatgattaac  
 T V V E K V G H M I P Q G V I L I L Q S V F E C T L D M I N  
 3331 aaagacttccagaatccagagcctcgtgtagaattttacaagttattgaaaggtcagcaatgagaatcatttggctgcattttggaa  
 K D F T E Y P E H R V E F Y K L L K V I N E K S F A A F L E  
 3421 ctacctcggctgctttaaattgtttgtgacgctatttggggcgttcaaacataacaatagagatgctcgaagtaattggtctacag  
 L P P A A F K L F V D A I C W A F K H N N R D V E V N G L Q

3511 attgattagacctagtgaaaaacattgaaagaatgggaaatgtcccatttgcaaatgagttccacaagaattatTTTTcattttgtc  
I A L D L V K N I E R M G N V P F A N E F H K N Y F F I F V  
3601 agtgaacgTTTTTTgTTTaaaccgattccgaccacaaatccggTTTTtcaagcaagcttTgttactaatgaagttgatttctttggtt  
S E T F F V L T D S D H K S G F S K Q A L L L M K L I S L V  
3691 tatgataacaagatttcggtaccattatcaagaagctgaggtaccacaaggaacttcaaatcaagctacttaagccaatattggct  
Y D N K I S V P L Y Q E A E V P Q G T S N Q V Y L S Q Y L A  
3781 aatatgtaagtaatgcattccccatttaacatccgaacaaatcgcaagTTTTtctctctgcattaactaacaatacaaaagacttagtg  
N M L S N A F P H L T S E Q I A S F L S A L T K Q Y K D L V  
3871 gtcttcaaaggcactttgagggactTTTTggTgcaaatcaagaagtcggaggtgatccaacagattattTgtttgctgaagataaagag  
V F K G T L R D F L V Q I K E V G G D P T D Y L F A E D K E  
3961aatgcattaatggaacagaatagactagagagggaaaaagctgccaagattggtgggttattaaagccttctgaacttgatgattag  
N A L M E Q N R L E R E K A A K I G G L L K P S E L D D \*

Plasmid name pQE60-hsTrn1  
 Encoded protein hsTrn1-His<sub>6</sub>  
 Features (nt) 1-2670 human Transportin 1  
 2683-2700 His<sub>6</sub>-tag

1 atggagatgatgaggaaacctgacgagcaagggtctcagcaaatcctgcagctgttgaaggagctccagctcccagacaccaccatccag  
 M E Y E W K P D E Q G L Q Q I L Q L L K E S Q S P D T T I Q  
 91 agaaccgtgcaacaaaactggaacaacttaacagatccagactttaacaactacttgattttgttcttacaaaattaaaatctgaa  
 R T V Q Q K L E Q L N Q Y P D F N N Y L I F V L T K L K S E  
 181 gatgaaccacaagatcattgagtggtcttattctgaagaataatgtgaaagcacactttcagaacttcccaaatggtgtaacagacttt  
 D E P T R S L S G L I L K N N V K A H F Q N F P N G V T D F  
 271 attaaaaagtgaaatgtttaaataatattggtgactcctcctcctgacttagagccactggttgattttgatcacaaactatagcctccaag  
 I K S E C L N N I G D S S P L I R A T V G I L I T T I A S K  
 361 ggagaattgcagaattggcctgacctcttaccaaaactctgtagcctggttgattctgaagattataaactgtgagggagcattttgtg  
 G E L Q N W P D L L P K L C S L L D S E D Y N T C E G A F G  
 451 gcccttcagaagatttgaagattctgctgagattttagacagtgatggttttagatcgtcctcacaacatcatgattcccaaatttta  
 A L Q K I C E D S A E I L D S D V L D R P L N I M I P K F L  
 541 cagttcttcaagcatagtagtccaaaaataaggtctcacgctggtgcatgtgcaatcagttatcatcagtaggactcaagctctaag  
 Q F F K H S S P K I R S H A V A C V N Q F I I S R T Q A L M  
 631 ttgcacattgattcttttattgagaatctctttgcatctggtgtagtgaagaaccagaggtacggaaaaatgtgtgccgagcactgtg  
 L H I D S F I E N L F A L A G D E E P E V R K N V C R A L V  
 721 atgttgctcgaagttcgaatggatcgctgcttctcactgacataatagattgagtagacgtacagaggtactcaagatcaagatgaa  
 M L L E V R M D R L L P H M H N I V E Y M L Q Q D Q D E  
 811 aatgtggctttagaagcctgtgaattttggtaacttttagctgaacagccaatagcaagatgtactcgtaaggcatcttccctaagttg  
 N V A L E A C E F W L T L A E Q P I C K D V L V R H L P K L  
 901 attcctgtgttagtgaatggcatgaagtactcagacatagatatctcacttaagggtgaggttgaagaagacgaacgattcctgat  
 I P V L V N G M K Y S D I D I I L L K G D V E E D E T I P D  
 991 agtgaacagatatacggccacgttttcaccgatcagggcaggtggctcagcagcatgatgaagatggaattgaagaggaagatgatg  
 S E Q D I R P R F H R S R T V A Q Q H D E D G I E E E D D D  
 1081 gatgatgaaattgatgatgatgacaatttctgactggaatctaaagaaatgttctgctgctgccctggatggtcttgcgaatgtgat  
 D D E I D D D T I S D W N L R K C S A A A L D V L A N V Y  
 1171 cgtgatgaactgctgcacatattttccccttttgaagaattacttttcatcagatgaatgggttgaagaatcagggcattttgtt  
 R D E L L P H I L P L L K E L L F H H E W V V K E S G I L V  
 1261 ttaggagcaattgctgaaggtgcatgcaggcatgattccatacttgctgagcttattcctcaccttattcagtgccctctctgataaa  
 L G A I A E G C M Q G M I P Y L P E L I P H L I Q C L S D K  
 1351 aaggctcttctgctgctcacaatcagctgactcttagccctgactgacacactgggtggtgagccagccgacagcagctgactgaa  
 K A L V R S I T C W T L S R Y A H W V V S Q P P D T Y L K P  
 1441 ttaatgacagaattgctaaagcgcactcctggacagcaacaagagagtacaagaagctgcctgagctgcttctgctaccctagaagagg  
 L M T E L L K R I L D S N K R V Q E A A C S A F A T L E E E  
 1531 gcttgacagaactgttcccttaccctgcttataacttgataccctggctcttgcatttagtaaataccagcataagaacactgctcatt  
 A C T E L V P Y L A Y I L D T L V F A F S K Y Q H K N L L I  
 1621 ctttacgatgcataggaacattagcagattcagtaggacatcatttaacaaaaccagaatataattcagatgctaatgctccactgatc  
 L Y D A I G T L A D S V G H H L N K P E Y I Q M L M P P L I  
 1711 cagaatggaacatgtaaaaggatgaagataaagatctctcccttacttgagtgcttatcttcagtgccacagcactgcagctgga  
 Q K W N M L K D E D K D L F P L L E C L S S V A T A L Q S G  
 1801 ttccctccgtactgtgaacctgtgtatcagcgttgtgtaaacctagtacagaagactcttgacagaagcctgtaaaccaatgctcaacca  
 F L P Y C E P V Y Q R C V N L V Q K T L A Q A M L N N A Q P  
 1891 gatcaatatgaagctccagataaagattttatgatagtggtctctgatttactgagtggtgctggtgagggacttgaggcaacattgaa  
 D Q Y E A P D K D F M I V A L D L L S G L A E G L G G N I E  
 1981 cagctgtagccgaaagtaacatcctgacactaatgtatcagtgatcagggataaaatgcccagaagtcgacagagttcttttggcctg  
 Q L V A R S N I L T L M Y Q C M Q D K M P E V R Q S S F A L  
 2071 ttaggtagacctcacaagcctgcttccagcagctgtaagcctgtatagctgatttcatgccaatattgggaaccaacctaaatccagaa  
 L G D L T K A C F Q H V K P C I A D F M P I L G T N L N P E  
 2161 ttcatttcagctgcaacaatggccacatgggaattggagaatctccattcaaatgggtatagagatgcagccttatattcctatgggtg  
 F I S V C N N A T W A I G E I S I Q M G I E M Q P Y I P M V  
 2251 ttgcaccagctttagaanaatcattaacagcccaacacacaaagcgttggtagagaatacagcaataacaattggtgctgcttgggttac  
 L H Q L V E I I N R P N T P K T L L E N T A I T I G R L G Y  
 2341 gtttgcctcaagaggtggcccccactgacagcagtttataagaccctggtgcacctctctgagaacataagagcaatgaggaaaag  
 V C P Q E V A P M L Q Q F I R P W C T S L R N I R D N E E K  
 2431 gattcagcattccgtggaattttgacctgatcagtggtgaatccagtggtgcaatccaagattttatattttttgtgagcctgttga  
 D S A F R G I C T M I S V N P S G V I Q D F I F F C D A V A  
 2521 tcattgattaaaccaaagatgatctcagagacatggtctgtaagatcctcattgattttaaatacaagttggcgatgaaaattggagg  
 S W I N P K D D L R D M F C K I L H G F K N Q V G D E N W R  
 2611 cgtttctcagcaggtttcctcctcccttaaaagagcgtcttgcagctttttatggtggtggtcagatctcatcaccatcaccatcac  
 R F S D Q F P L P L K E R L A A F Y G V G S R S H H H H H  
 2701 taa  
 \*

|                 |                                                   |                                 |
|-----------------|---------------------------------------------------|---------------------------------|
| Plasmid name    | pQE60-hsImp $\beta$ <sup>45-462</sup>             |                                 |
| Encoded protein | hsImp $\beta$ <sup>45-462</sup> -His <sub>6</sub> |                                 |
| Features (nt)   | 4-1257                                            | hsImp $\beta$ <sup>45-462</sup> |
|                 | 1270-1287                                         | His <sub>6</sub> -tag           |

```

1 atggcaaatccaggaaacagtcaggttgccagagttgcagctggctctacaaatcaagaactctttgacatctaagatccagatatcaag
M A N P G N S Q V A R V A A G L Q I K N S L T S K D P D I K
91 gcacaatatcagcagaggtggcttgcattgatgctaatactgcagcagaagtcagaactatgttttgcagacattgggtacagaaact
A Q Y Q Q R W L A I D A N A R R E V K N Y V L Q T L G T E T
181 taccggcctagttctgcctcacagtggtggctggattgcttgcagagatcccagtaaacagtgccagaactcattcctcagctg
Y R P S S A S Q C V A G I A C A E I P V N Q W P E L I P Q L
271 gtggccaatgtcacaacccaacagcagagcacatgaaggagtcgacattggaagccatcggttatatttccaagatatagacca
V A N V T N P N S T E H M K E S T L E A I G Y I C Q D I D P
361 gacagctacaagataaatccaatgagattctgactgccataatccaggggatgaggaagaagagcctagtaataatgtgaagctagct
E Q L Q D K S N E I L T A I I Q G M R K E E P S N N V K L A
451 gctacgaatgcactcctgaactcattggagttcaccaaagcaactttgataaagagctgaaagcactttatgatcaggtggctgt
A T N A L L N S L E F T K A N F D K E S E R H F I M Q V V C
541 gaagccacacagtgccagatacagggtagcagtgctgtttacagaactcggtagagataatgctccttatattatcagtcacatggag
E A T Q C P D T R V R V A A L Q N L V K I M S L Y Y Q Y M E
631 acatatatgggtcctgctcttttgcatacaatcgaagcaatgaaagtgacattgatgaggtggctttacaagggatagaattctgg
T Y M G P A L F A I T I E A M K S D I D E V A L Q G I E F W
721 tccaatgtctgtgatgaggaatggatttggcattgaagctcagagggcagcagaacaaggacggccccctgagcacaccagcaagttt
S N V C D E E M D L A I E A S E A A E Q G R P P E H T S K F
811 tatgcaaggggagcactacagtatctggttccaatcctcacacagcactaactaaacaggacgaaaatgatgatgacgatgactggaac
Y A K G A L Q Y L V P I L T Q T L T K Q D E N D D D D D W N
901 cctgcaaagcagcaggggtgctcctcatgcttctgcccactgctgtgaagatgacattgtcccacatgtcctccccttcattaaagaa
P C K A A G V C L M L L A T C C E D D I V P H V L P F I K E
991 cacatcaagaaccagattggcgtaccgggatgcagcagtgatggcttttgggtgatcttggaaaggaccagaccagtcagctcaaa
H I K N P D W R Y R D A A V M A F G C I L E G P E P S Q L K
1081 ccactagtatacaggctatgccaccctaataagaattaatgaaagaccccagtgtagttgttcgagatacagctgcatggactgtaggc
P L V I Q A M P T L I E L M K D P S V V V R D T A A W T V G
1171 agaatttgtgagctgcttctgaaagctgccatcaatgatgtcacttggctcccctgctacagtgctgattgaaaggtctcagtgctgga
R I C E L L P E A A I N D V Y L A P L L Q C L I E G L S A G
1261 tccagatctcatcaccatcaccatcactaa
S R S H H H H H H *

```
